# Supplementary material for: The importance of radiation for semi-empirical water-use efficiency models
Source: Copernicus journal article supplement (doi:10.5194/bg-2016-524), 2017-01-05
Supplement: Supplementary file 1 [file bg-2016-524-supplement.pdf]

## Supplement

### S1 Impact of parameter correlation on ET attribution to radiation

5 As outlined in *Sect. 2 Data & methods*, we performed an analysis of the respective contributions of the additive terms in the linear models. We exemplified this with a simple linear model

$$Y = a_1 \cdot X_1 + a_2 \cdot X_2, \quad (\text{S1})$$

10 where  $Y$  denotes the dependent variable,  $a_1$  and  $a_2$  denote parameters and  $X_1$  and  $X_2$  are two explanatory variables. We can calculate the contribution of a variable  $X_i$  as

$$f_{X_i} = \frac{\sum a_i \cdot X_i}{\sum a_1 \cdot X_1 + a_2 \cdot X_2}. \quad (\text{S2})$$

15

In many realistic examples, the model parameters  $a_1$  and  $a_2$  are not perfectly identifiable. This could be due to the correlation of  $X_1$  and  $X_2$  or more fundamental model structural uncertainty. In these cases,  $f_{X_i}$  is confounded by the parameter correlation  $a_1$  and  $a_2$ , leading to a high uncertainty of its estimation. To evaluate this effect, we estimated the contribution of the described within-site uncertainty of  $f_{X_i}$ . The variance-covariance matrix ( $V$ ) of the parameter estimates could be

20 calculated for each site with the results of the regression. Consequently,  $V$  can be used to derive the respective posterior parameter distributions, from which we sampled 200 parameter vectors per site, representing the uncertainty and correlation of the two parameters. Site-specific vectors  $f_{X_i,S}$  can be calculated as

$$f_{X_i,S_j} = [f_{X_i,S_j,p_1}, f_{X_i,S_j,p_2}, \dots, f_{X_i,S_j,p_{200}}], \quad (\text{S3})$$

25

where  $p_1$  to  $p_{200}$  denote the 200 realizations of parameter vectors and  $s_j$  denotes a specific site.

Based on this, we tested whether the global variance of  $f_{X_i}$  is a product of differing means of the site-specific  $f_{X_i,S}$  vectors or their variances. For this, we performed an ANOVA along the sites as categorical variable with the parameter realizations as

30 random replicates.

## S2 Overview over all FLUXNET sites used

Table S1 contains an overview of all FLUXNET sites used in our analysis. A full description of all FLUXNET sites can be found at <http://fluxnet.fluxdata.org/sites/site-list-and-pages/>

**Table S1. Overview of all FLUXNET sites used in our analysis.**

| Site   | Site-Years             | Biome (IGBP) | Climate (K.-Geiger) |
|--------|------------------------|--------------|---------------------|
| AT-Neu | 2002-2004              | GRA          | Cfb                 |
| AU-How | 2001-2006              | WSA          | Aw                  |
| AU-Tum | 2001-2006              | EBF          | Cfb                 |
| AU-Wac | 2005-2007              | EBF          | Cfb                 |
| BE-Bra | 1997-2006 <sup>1</sup> | MF           | Cfb                 |
| BE-Lon | 2004-2006              | CRO          | Cfb                 |
| BE-Vie | 1996-2006              | MF           | Cfb                 |
| BW-Ghg | 2003                   | SAV          | BSh                 |
| BW-Ghm | 2003                   | WSA          | BSh                 |
| BW-Ma1 | 1999-2001              | WSA          | BSh                 |
| CA-Man | 1994-2003              | ENF          | Dfc                 |
| CA-NS1 | 2002-2005              | ENF          | Dfc                 |
| CA-NS2 | 2001-2005              | ENF          | Dfc                 |
| CA-NS3 | 2001-2005              | ENF          | Dfc                 |
| CA-NS4 | 2002-2004              | ENF          | Dfc                 |
| CA-NS5 | 2001-2005              | ENF          | Dfc                 |
| CA-NS6 | 2001-2005              | OSH          | Dfc                 |
| CA-NS7 | 2002-2005              | OSH          | Dfc                 |
| CA-Qcu | 2001-2006              | ENF          | Dfc                 |
| CA-Qfo | 2003-2006              | ENF          | Dfc                 |
| CA-SF1 | 2003-2005              | ENF          | Dfc                 |
| CA-SF2 | 2003-2005              | ENF          | Dfc                 |

<sup>1</sup> No observations in the years 1999 and 2003.

|        |           |     |     |
|--------|-----------|-----|-----|
| CA-SF3 | 2003-2005 | ENF | Dfc |
| CH-Oe1 | 2002-2006 | GRA | Cfb |
| CZ-BK1 | 2000-2006 | ENF | Dfb |
| DE-Geb | 2004-2006 | CRO | Cfb |
| DE-Gri | 2005-2006 | GRA | Cfb |
| DE-Hai | 2000-2006 | DBF | Cfb |
| DE-Kli | 2004-2006 | CRO | Cfb |
| DE-Meh | 2003-2006 | GRA | Cfb |
| DE-Tha | 1996-2006 | ENF | Cfb |
| DE-Wet | 2002-2006 | ENF | Cfb |
| DK-Lva | 2005-2006 | GRA | Cfb |
| DK-Ris | 2004-2005 | CRO | Cfb |
| DK-Sor | 1996-2006 | DBF | Cfb |
| ES-ES1 | 1999-2006 | ENF | Csa |
| ES-ES2 | 2004-2006 | CRO | Csa |
| ES-LMa | 2004-2006 | SAV | Csa |
| ES-VDA | 2004-2006 | GRA | Cfb |
| FI-Hyy | 1996-2006 | ENF | Dfc |
| FI-Sod | 2000-2006 | ENF | Dfc |
| FR-Fon | 2005-2006 | DBF | Cfb |
| FR-Gri | 2005-2006 | CRO | Cfb |
| FR-Hes | 1997-2006 | DBF | Cfb |
| FR-LBr | 1996-2006 | ENF | Cfb |
| FR-Lq1 | 2004-2006 | GRA | Cfb |
| FR-Lq2 | 2004-2006 | GRA | Cfb |
| FR-Pue | 2000-2006 | EBF | Csa |
| HU-Bug | 2002-2006 | GRA | Cfb |
| HU-Mat | 2004-2006 | GRA | Cfb |
| IE-Dri | 2003-2005 | GRA | Cfb |
| IL-Yat | 2001-2006 | ENF | BSh |
| IT-Amp | 2002-2006 | GRA | Cfa |
| IT-BCi | 2004-2006 | CRO | Csa |

|        |           |     |     |
|--------|-----------|-----|-----|
| IT-Col | 1996-2006 | DBF | Cfa |
| IT-Cpz | 1997-2006 | EBF | Csa |
| IT-Lav | 2000-2006 | ENF | Cfb |
| IT-Lec | 2005-2006 | EBF | Cfa |
| IT-LMa | 2003-2006 | GRA | Cfb |
| IT-Mal | 2003-2006 | GRA | Cfb |
| IT-MBo | 2003-2006 | GRA | Cfb |
| IT-Non | 2001-2006 | DBF | Cfa |
| IT-Pia | 2002-2005 | OSH | Csa |
| IT-PT1 | 2002-2004 | DBF | Cfa |
| IT-Ren | 1999-2006 | ENF | Dfb |
| IT-Ro1 | 2000-2006 | DBF | Csa |
| IT-Ro2 | 2002-2006 | DBF | Csa |
| IT-SRo | 1999-2006 | ENF | Csa |
| NL-Ca1 | 2003-2006 | GRA | Cfb |
| NL-Hor | 2004-2006 | GRA | Cfb |
| NL-Loo | 1996-2006 | ENF | Cfb |
| NL-Lut | 2006      | CRO | Cfb |
| PT-Esp | 2002-2006 | EBF | Csa |
| PT-Mi1 | 2003-2005 | EBF | Csa |
| PT-Mi2 | 2004-2006 | GRA | Csa |
| RU-Fyo | 1998-2004 | ENF | Dfb |
| RU-Ha1 | 2002-2004 | GRA | Dfc |
| RU-Zot | 2002-2004 | ENF | Dfc |
| SE-Fla | 1996-2002 | ENF | Dfc |
| SE-Nor | 1996-2005 | ENF | Dfb |
| SK-Tat | 2005      | ENF | Dfb |
| UK-ESa | 2003-2005 | CRO | Cfb |
| UK-Gri | 1997-2006 | ENF | Cfc |
| UK-Ham | 2004-2005 | DBF | Cfb |
| UK-PL3 | 2005-2006 | DBF | Cfb |
| US-ARM | 2003-2006 | CRO | Cfa |

|        |           |     |     |
|--------|-----------|-----|-----|
| US-Aud | 2002-2006 | GRA | BSk |
| US-Bar | 2004-2005 | DBF | Dfb |
| US-Bkg | 2004-2006 | GRA | Dfa |
| US-Blo | 1997-2006 | ENF | Csa |
| US-Bo1 | 1996-2007 | CRO | Dfa |
| US-FPe | 2000-2006 | GRA | BSk |
| US-Goo | 2002-2006 | GRA | Cfa |
| US-Ha1 | 1991-2006 | DBF | Dfb |
| US-Ho1 | 1996-2004 | ENF | Dfb |
| US-Me4 | 1996-2000 | ENF | Csb |
| US-MMS | 1999-2005 | DBF | Cfa |
| US-MOz | 2004-2006 | DBF | Cfa |
| US-Ne1 | 2001-2005 | CRO | Dfa |
| US-Ne2 | 2001-2005 | CRO | Dfa |
| US-Ne3 | 2001-2005 | CRO | Dfa |
| US-PFa | 1996-2003 | MF  | Dfb |
| US-SP1 | 2000-2005 | ENF | Cfa |
| US-SP2 | 1998-2004 | ENF | Cfa |
| US-SP3 | 1999-2004 | ENF | Cfa |
| US-Syv | 2002-2006 | MF  | Dfb |
| US-Ton | 2001-2006 | WSA | Csa |
| US-UMB | 1999-2003 | DBF | Dfb |
| US-Var | 2001-2006 | GRA | Csa |
| US-WCr | 1999-2006 | DBF | Dfb |
| US-Wi4 | 2002-2005 | ENF | Dfb |
| ZA-Kru | 2001-2003 | SAV | Cwa |
